# Supplementary material for: NU7441, a selective inhibitor of DNA-PKcs, alleviates intracerebral hemorrhage injury with suppression of ferroptosis in brain
Source: PeerJ. 2024 Nov 19;12:e18489. doi: 10.7717/peerj.18489 (PMC11583913; doi:10.7717/peerj.18489)
Supplement: Supplemental Information 4 [file peerj-12-18489-s004.xlsx]

## Sheet: figure1
figure1B	DNA-PKcs/β-actin
Time	sham			ICH
0.25	0.13	0.11	0.04	0.23	0.14	0.09
1	0.13	0.2	0.07	0.19	0.29	0.12
3	0.17	0.21	0.09	0.42	0.39	0.39
7	0.19	0.1	0.08	0.31	0.2	0.3
14	0.18	0.12	0.09	0.18	0.26	0.23
Time	sham			ICH
	Mean	SEM	N	Mean	SEM	N
0.25	0.0933333	0.0272845	3	0.153333	0.0409607	3
1	0.133333	0.0375648	3	0.2	0.0493288	3
3	0.156667	0.0352767	3	0.4	0.01	3
7	0.123333	0.0338296	3	0.27	0.0351188	3
14	0.13	0.0264575	3	0.223333	0.0233333	3
One-way anova
F=17.08	P=0.0177
Bonferroni test
	significant	summary	P Value
6h sham vs. ICH	No	ns	p=0.290
1d sham vs. ICH	No	ns	p=0.343
3d sham vs. ICH	Yes	**	p=0.003
7d sham vs. ICH	Yes	*	p=0.04
14d sham vs. ICH	No	ns	p=0.057
figure1D	γ-H2AX/β-actin
Time	sham			ICH
0.25	0.21	0.14	0.1	0.26	0.1	0.09
1	0.16	0.24	0.06	0.25	0.32	0.27
3	0.29	0.15	0.08	0.49	0.38	0.49
7	0.28	0.18	0.05	0.4	0.37	0.62
14	0.21	0.18	0.03	0.28	0.23	0.51
Time	sham			ICH
	Mean	SEM	N	Mean	SEM	N
0.25	0.15	0.0321455	3	0.15	0.0550757	3
1	0.153333	0.0520683	3	0.28	0.0208167	3
3	0.173333	0.0617342	3	0.453333	0.0366667	3
7	0.17	0.0665833	3	0.463333	0.0788106	3
14	0.14	0.0556776	3	0.34	0.0862168	3
One-way anova
F=86.08	P=0.0008
Bonferroni test
	significant	summary	P Value
6h sham vs. ICH	No	ns	p=1
1d sham vs. ICH	No	ns	p=0.087
3d sham vs. ICH	Yes	*	p=0.018
7d sham vs. ICH	Yes	*	p=0.047
14d sham vs. ICH	No	ns	p=0.123
	figure1F	DNA-PKcs/β-actin
	sham	ICH（0.2U）	ICH（0.5U）	NU7441
	0.04	0.11	0.26	0.05
	0.03	0.18	0.21	0.04
	0.04	0.13	0.34	0.06
N	3	3	3	3
Mean	0.035	0.15	0.2725	0.0475
SEM	0.002887	0.0178	0.02689	0.004787
One-way anova
F=45.42	P<0.0001
Bonferroni test
	significant	summary	P Value
ICH (0.2U) vs. ICH (0.5U)	YES	***	P=0.009
ICH (0.2U) vs. NU7441	YES	**	P=0.0014
ICH (0.5U) vs. NU7441	YES	**	P=0.0002
	figure1G	mNss score
	sham	ICH（0.2U）	ICH（0.5U）	NU7441
	0	10	14	7
	1	9	13	8
	0	10	12	7
N	3	3	3	3
Mean	0.25	9.75	13.25	7
SEM	0.25	0.25	0.4787	0.4082
One-way anova
F=232.8	P<0.0001
Bonferroni test
	significant	summary	P Value
ICH (0.2U) vs. ICH (0.5U)	YES	***	P=0.0006
ICH (0.2U) vs. NU7441	YES	**	P=0.0012
ICH (0.5U) vs. NU7441	YES	***	P＜0.0001

## Sheet: figure2
figure2B DNA-PKcs/β-actin
	sham	hemin
	0.07	0.43
	0.08	0.4
	0.09	0.54
	0.03	0.37
N	4	4
Mean	0.0675	0.435
SEM	0.01315	0.03708
One-way anova
F=7.952	P＜0.0001
Bonferroni test
	significant	summary	P Value
Sham vs. Hemin	YES	***	P＜0.0001
figure2C	DNAPKcs mRNA fold change
	sham	hemin
	1.0026	2.6688
	1.0807	2.5988
	0.9974	2.5199
N	3	3
Mean	1.027	2.596
SEM	0.02694	0.04301
One-way anova
F=2.548	P＜0.0001
Bonferroni test
	significant	summary	P Value
Sham vs. Hemin	YES	***	P＜0.0001
figure2D γ-H2AX/β-actin
	sham	hemin
	0.12	0.58
	0.17	0.44
	0.16	0.56
	0.34	0.54
N	4	4
Mean	0.1975	0.53
SEM	0.04871	0.03109
One-way anova
F=2.455	P=0.0012
Bonferroni test
	significant	summary	P Value
Sham vs. Hemin	YES	**	P=0.0012

## Sheet: figure3
figure3A	Corner Test
	sham	ICH	NU7441
	50	90.1	79
	51	95.6	77
	49	94.7	78
N	3	3	3
Mean	50	93.47	78
SEM	0.5774	1.703	0.5774
One-way anova
F=408.2	P<0.0001
Bonferroni test
	significant	summary	P Value
Sham vs. ICH	YES	**	P＜0.0001
ICH vs. NU7441	YES	***	P=0.0010
figure3B	Rotarod treadmill
	sham	ICH	NU7441
	120	10	35
	134	9	30
	135	7	27
N	3	3	3
Mean	129.7	8.667	30.67
SEM	4.842	0.8819	2.333
One-way anova
F=420.1	P<0.0001
Bonferroni test
	significant	summary	P Value
Sham vs. ICH	YES	***	P＜0.0001
ICH vs. NU7441	YES	***	P=0.0009
figure3C	Number of neurons
	sham	ICH	NU7441
	280	21	112
	230	28	125
	281	30	108
	257	29	87
	228	22	92
	247	24	100
	228	25	83
	241	31	90
	256	27	88
N	9	9	9
Mean	249.8	26.33	98.33
SEM	6.875	1.179	4.676
One-way anova
F=553.4	P<0.0001
Bonferroni test
	significant	summary	P Value
Sham vs. ICH	YES	***	P＜0.0001
ICH vs. NU7441	YES	***	P＜0.0001
figure3G	Relative viable cells
	Sham	Hemin	NU7441
	1.2291	0.6798	0.9104
	1.2153	0.6763	0.9102
	1.1757	0.6789	0.9208
	1.1266	0.6761	0.9204
N	4	4	4
Mean	1.187	0.6778	0.9155
SEM	0.023	0.0009286	0.002975
One-way anova
F=361.0	P<0.0001
Bonferroni test
	significant	summary	P Value
Sham vs. ICH	YES	***	P＜0.0001
ICH vs. NU7441	YES	***	P＜0.0001
Sham vs. NU7441	YES	***	P＜0.0001

## Sheet: figure4
figure4	brain water content（%）
		Sham			ICH			NU7441
	Ipsi-BG	79.42	78.92	79.03	83.4	84.06	84.78	79.02	79.89	80.04
	Ipsi-CX	78.85	78.61	78.09	78.48	78.85	78.9	77.9	78.64	78.02
	Cont-BG	76.43	75.92	76.99	76.78	77.3	75.89	76.45	77.1	76.8
	Cont-CX	76.34	76.65	77.1	76.71	77.21	76.34	76.84	76.91	76.17
	Sham			ICH			NU7441
	Mean	SEM	N	Mean	SEM	N
Ipsi-BG	79.1233	0.151694	3	84.08	0.398497	3	79.65	0.317962	3
Ipsi-CX	78.5167	0.224301	3	78.7433	0.132455	3	78.1867	0.229298	3
Cont-BG	76.4467	0.308995	3	76.6567	0.411677	3	76.7833	0.187824	3
Cont-CX	76.6967	0.22063	3	76.7533	0.25208	3	76.64	0.235867	3
One-way anova
F=0.4305	P=0.6629

## Sheet: figure5
figure5B	apoptosis incidence（%）
	sham	ICH	NU7441
	7.6	53.2	38
	16.7	42.4	32.2
	9.9	51.1	19.3
N	3	3	3
Mean	11.4	48.9	29.83
SEM	2.732	3.306	5.526
One-way anova
F=21.56	P=0.0018
Bonferroni test
	significant	summary	P Value
Sham vs. ICH	YES	***	P=0.0009
ICH vs. NU7441	YES	*	P=0.0415
figure5D	apoptosis incidence（%）
	sham	hemin	NU7441
	3.6	29.83	13.11
	2.54	30.2	13.2
	3.03	30.22	12.66
N	3	3	3
Mean	3.057	30.08	12.99
SEM	0.3063	0.1268	0.167
One-way anova
F=4069	P<0.0001
Bonferroni test
	significant	summary	P Value
Sham vs. Hemin	YES	***	P＜0.0001
Hemin vs. NU7441	YES	***	P＜0.0001

## Sheet: figure6
figure6C	Mean fluorescent intensity
	Sham	ICH	NU7441
	6546.7	22486.9	12552.8
	7409.9	25498.6	17119.4
	8430.3	32353	15508.1
N	3	3	3
Mean	7462	26780	15060
SEM	544.4	2919	1337
One-way anova
F=26.79	P=0.0010
Bonferroni test
	significant	summary	P Value
Sham vs. ICH	YES	**	P=0.0029
ICH vs. NU7441	YES	*	P=0.0218
figure6D	Mean fluorescent intensity
	Sham	Hemin	NU7441
	1014.5	10193.8	5772.3
	1047.2	9747	5946
	1037.5	9822.8	6063.2
N	3	3	3
Mean	1033	9921	5927
SEM	9.696	138	84.5
One-way anova
F=2261	P<0.0001
Bonferroni test
	significant	summary	P Value
Sham vs. Hemin	YES	***	P＜0.0001
Hemin vs. NU7441	YES	***	P＜0.0001

## Sheet: figure7
figure7B	GPX4 protein fold change
	Sham	ICH	NU7441
	0.56	0.1	0.35
	0.5	0.14	0.36
	0.51	0.1	0.36
N	3	3	3
Mean	0.5233	0.1133	0.3567
SEM	0.01856	0.01333	0.003333
One-way anova
F=239.1	P<0.0001
Bonferroni test
	significant	summary	P Value
Sham vs. ICH	YES	***	P＜0.0001
ICH vs. NU7441	YES	***	P＜0.0001

## Sheet: figure8
figure8C	GPX4 mRNA fold change
	sham	Hemin	NU7441
	1.031	0.5003	0.723
	0.9967	0.5368	0.7016
	1.0745	0.5385	0.7276
N	3	3	3
Mean	1.034	0.5252	0.7174
SEM	0.02251	0.01246	0.008011
One-way anova
F=272.8	P<0.0001
Bonferroni test
	significant	summary	P Value
Sham vs. Hemin	YES	***	P＜0.0001
Hemin vs. NU7441	YES	***	P=0.0012
figure8B	GPX4 protein fold change
	Sham	Hemin	NU7441
	0.51	0.14	0.36
	0.54	0.08	0.34
	0.49	0.1	0.29
N	3	3	3
Mean	0.5133	0.1067	0.33
SEM	0.01453	0.01764	0.02082
One-way anova
F=130.2	P<0.0001
Bonferroni test
	significant	summary	P Value
Sham vs. Hemin	YES	***	P＜0.0001
Hemin vs. NU7441	YES	***	P=0.0002
